# Supplementary material for: Comprehensive analysis of micro RNAs in recurrent implantation failures patients and construction of prediction models based on circulating micro RNAs
Source: Research Square preprint supplement (doi:10.21203/rs.3.rs-145125/v1), 2021-01-15
Supplement: Supplementary file 3 [file e9acd8c4d2cf0b9223a43816.xlsx]

## Sheet: Table 1 clinical characteristic
Table 1. Clinical characteristics of GSE71331 and GSE71332
	RIF			CON			P-value
	mean	SD	n	mean	SD	n
age	31.5714	4.85994	7	31	3.53553	5	0.734937
Number of failed cycles	5.14286	3.13202	7	0	0	5	0.003295
Number of transferred embryos	12.4286	6.1062	7	2	0	5	<0.000001
Number of high quality transferred embryos	7.57143	1.51186	7	1.6	0.547723	5	0.000746
Endometrial thickness on the day of LH surge	0.942857	0.151186	7	1.08	0.109545	5	0.935209
The day of sample (post the day of LH surge )	6.57143	0.786796	7	7.2	0.447214	5	0.709606
